# Supplementary material for: Straightforward synthesis of bis-tetraazacycloalkanes: towards new potential CXCR4 antagonists?
Source: Royal Society of Chemistry journal article supplement (doi:10.1039/c7ra04218c), 2017-01-01
Supplement: c7ra04218c1.pdf [file c7ra04218c1.pdf]

## Electronic Supporting information

### Straightforward synthesis of bistetraazacycloalkanes: towards new potential CXCR4 antagonists?

Nicolas Sok,<sup>[a]\*</sup> Isabelle Baglin,<sup>[b]</sup> Christelle Basset,<sup>[c]</sup> Fatima Fakor,<sup>[d]</sup> Evelyne Kohli,<sup>[c]</sup>  
Yoann Rousselin,<sup>[b]</sup> Claire Bernhard,<sup>b</sup> Frédéric Boschetti,<sup>[b]</sup> Christine Goze,<sup>[b]</sup> and  
Franck Denat <sup>[b]\*</sup>

#### Table of contents

|                                                                                                           |    |
|-----------------------------------------------------------------------------------------------------------|----|
| Figure 1: <sup>1</sup> H NMR of the mixture compound 2 a-c (300 MHz, CDCl <sub>3</sub> , 300 K).....      | 1  |
| Figure 2: <sup>13</sup> C NMR of the mixture of compounds 2 a-c (75 MHz, CDCl <sub>3</sub> , 300 K) ..... | 1  |
| Figure 3: Mass spectrum of the mixture of compounds 2 a-c (HRMS-MALDI-TOF) .....                          | 2  |
| Figure 4: <sup>1</sup> H NMR of the mixture of compounds 3 a-c (300 MHz, CDCl <sub>3</sub> , 300 K).....  | 2  |
| Figure 5: <sup>13</sup> C NMR of the mixture of compounds 3 a-c (75 MHz, CDCl <sub>3</sub> , 300 K) ..... | 3  |
| Figure 6: Mass spectrum of the mixture of compounds 3 a-c (HRMS-MALDI-TOF) .....                          | 3  |
| Figure 7: <sup>1</sup> H NMR of compound 4 a -c (300 MHz, CDCl <sub>3</sub> , 300 K) .....                | 4  |
| Figure 8: Mass spectrum of compound 4 a - c (ESI-TOF) .....                                               | 4  |
| Figure 9: <sup>1</sup> H NMR of compound 5 (300 MHz, D <sub>2</sub> O, 300 K) .....                       | 5  |
| Figure 10: <sup>13</sup> C NMR of compound 5 (75 MHz, D <sub>2</sub> O, 300 K) .....                      | 5  |
| Figure 11: Mass spectrum of compound 5 (ESI-TOF).....                                                     | 6  |
| Figure 12: <sup>1</sup> H NMR of compound 6 (300 MHz, D <sub>2</sub> O, 300 K) .....                      | 6  |
| Figure 13: <sup>13</sup> C NMR of compound 6 (75 MHz, D <sub>2</sub> O, 300 K) .....                      | 7  |
| Figure 14: Mass spectrum of compound 6 (ESI-TOF) .....                                                    | 7  |
| Figure 15: <sup>1</sup> H NMR of compound 7 (600 MHz, D <sub>2</sub> O, 300 K) .....                      | 8  |
| Figure 16: <sup>13</sup> C NMR of compound 7 (150 MHz, D <sub>2</sub> O, 300 K) .....                     | 8  |
| Figure 17: Mass spectrum of compound 7 (ESI-TOF) .....                                                    | 9  |
| Figure 18: <sup>1</sup> H NMR of compound 8 (300 MHz, CDCl <sub>3</sub> , 300 K) .....                    | 9  |
| Figure 19: <sup>13</sup> C NMR of compound 8 (150 MHz, CDCl <sub>3</sub> , 300 K) .....                   | 10 |
| Figure 20: Mass spectrum of compound 8 (HRMS-MALDI-TOF) .....                                             | 10 |
| Figure 21: <sup>1</sup> H NMR of compound 9 (150 MHz, CDCl <sub>3</sub> , 300 K) .....                    | 11 |
| Figure 22: <sup>13</sup> C NMR of compound 9 (150 MHz, CDCl <sub>3</sub> , 300 K) .....                   | 11 |
| Figure 23: Mass spectrum of compound 9 (HRMS-MALDI-TOF) .....                                             | 12 |
| Figure 24: <sup>1</sup> H NMR of compound 11 (300 MHz, CDCl <sub>3</sub> , 300 K) .....                   | 12 |
| Figure 25: <sup>13</sup> C NMR of compound 11 (75 MHz, CDCl <sub>3</sub> , 300 K) .....                   | 13 |
| Figure 26: Mass spectrum of compound 11 (MALDI-TOF) .....                                                 | 13 |
| Figure 27: <sup>1</sup> H NMR of compound 12 (300 MHz, CDCl <sub>3</sub> , 300 K) .....                   | 14 |
| Figure 28: <sup>13</sup> C NMR of compound 12 (75 MHz, CDCl <sub>3</sub> , 300 K) .....                   | 14 |
| Figure 29: Mass spectrum of compound 12 (ESI-TOF) .....                                                   | 15 |

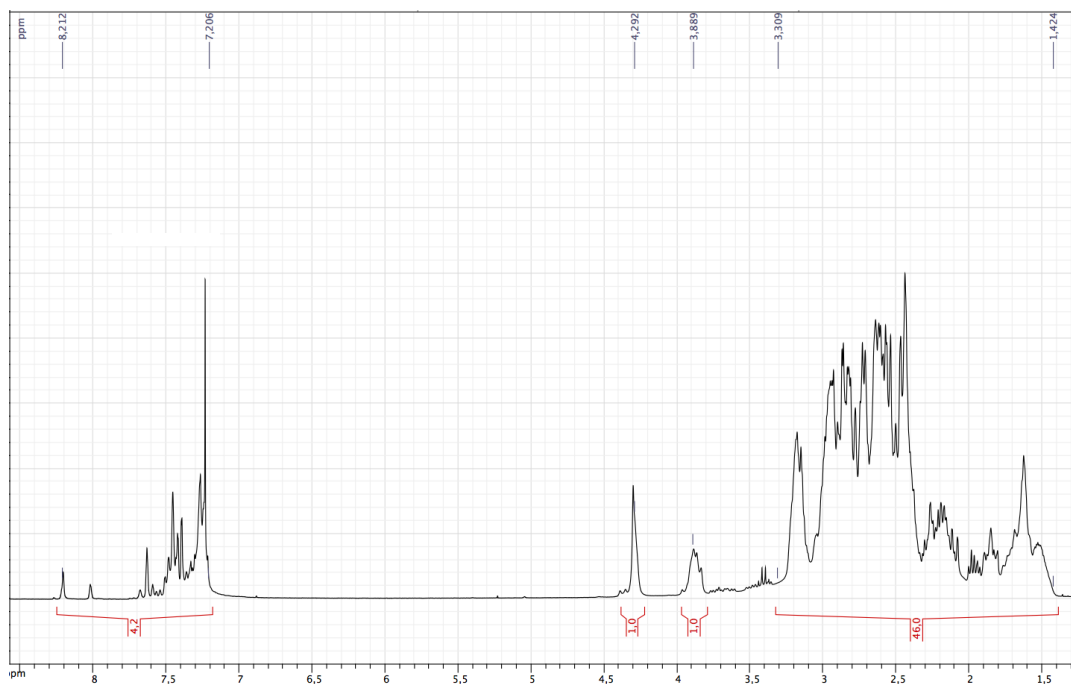

Figure 1:  $^1\text{H}$  NMR of the mixture compound 2 a-c (300 MHz,  $\text{CDCl}_3$ , 300 K)

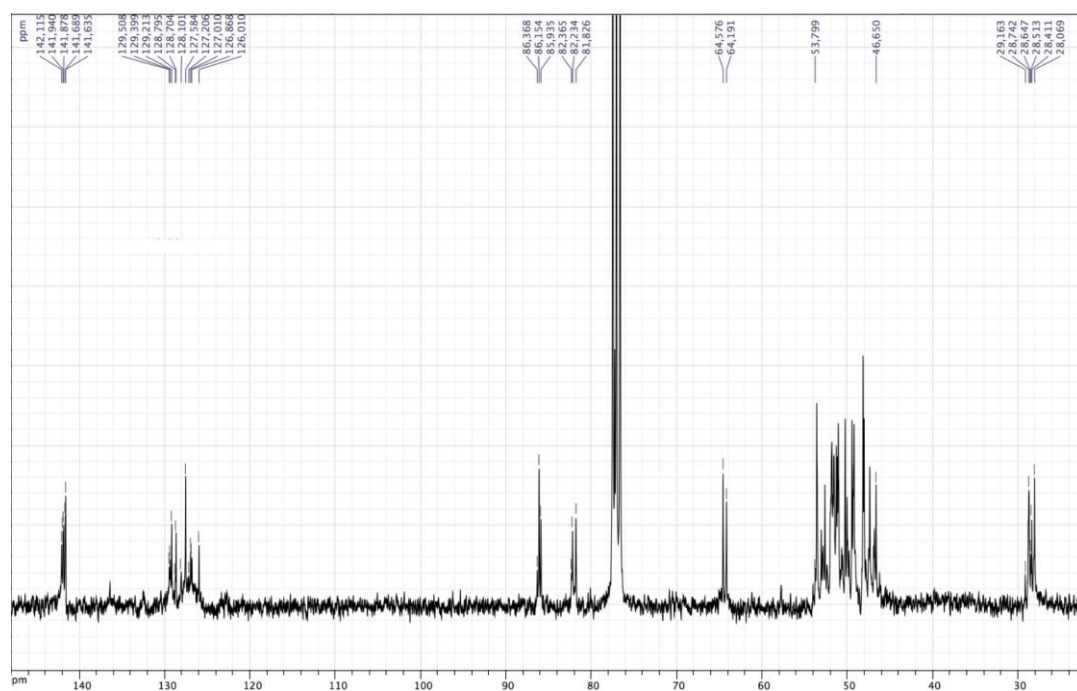

Figure 2:  $^{13}\text{C}$  NMR of the mixture of compounds 2 a-c (75 MHz,  $\text{CDCl}_3$ , 300 K)

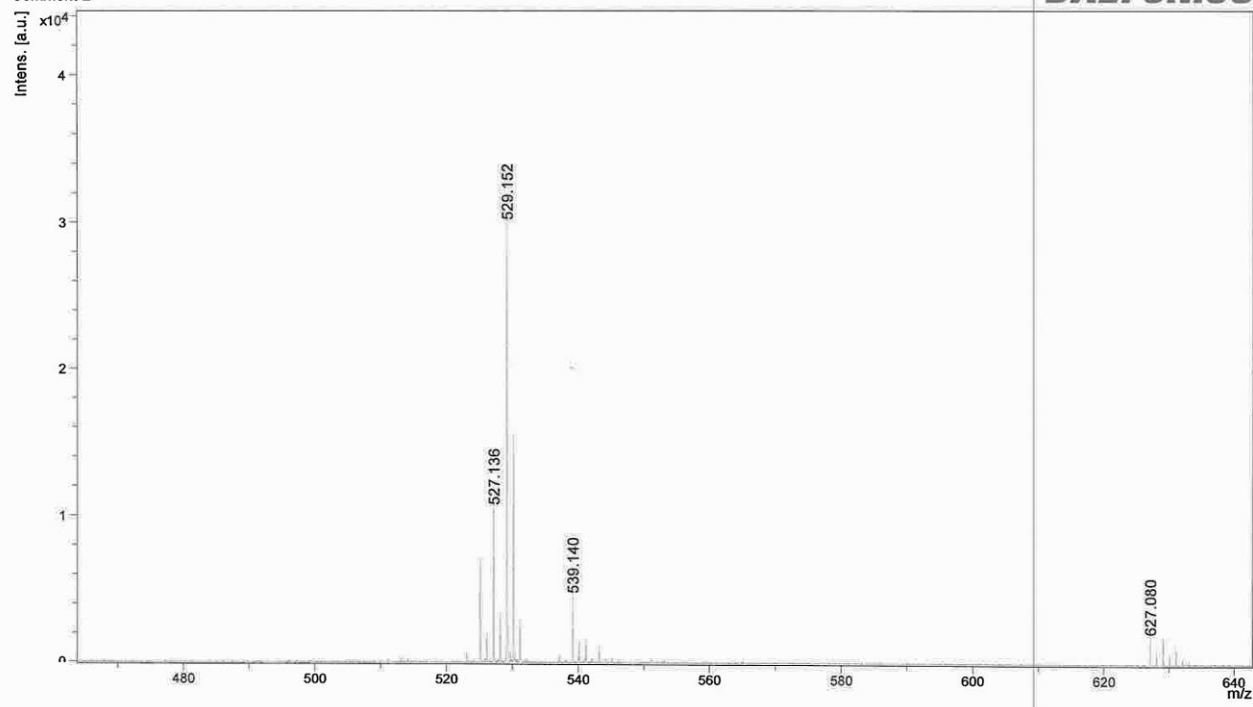

Figure 3: Mass spectrum of the mixture of compounds 2 a-c (HRMS-MALDI-TOF)

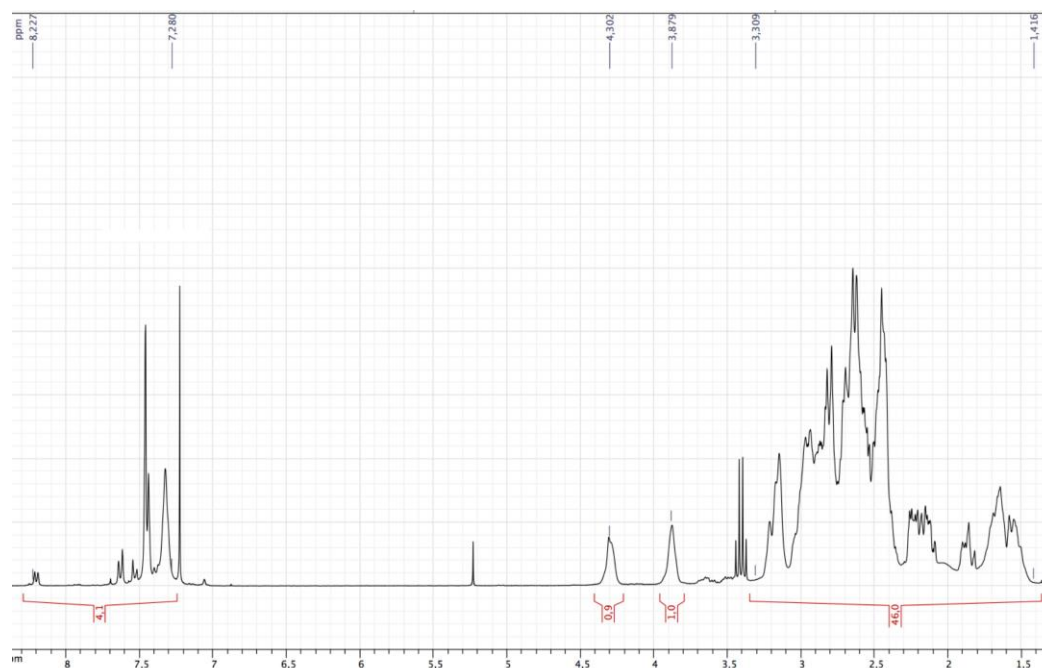

Figure 4: <sup>1</sup>H NMR of the mixture of compounds 3 a-c (300 MHz, CDCl<sub>3</sub>, 300 K)

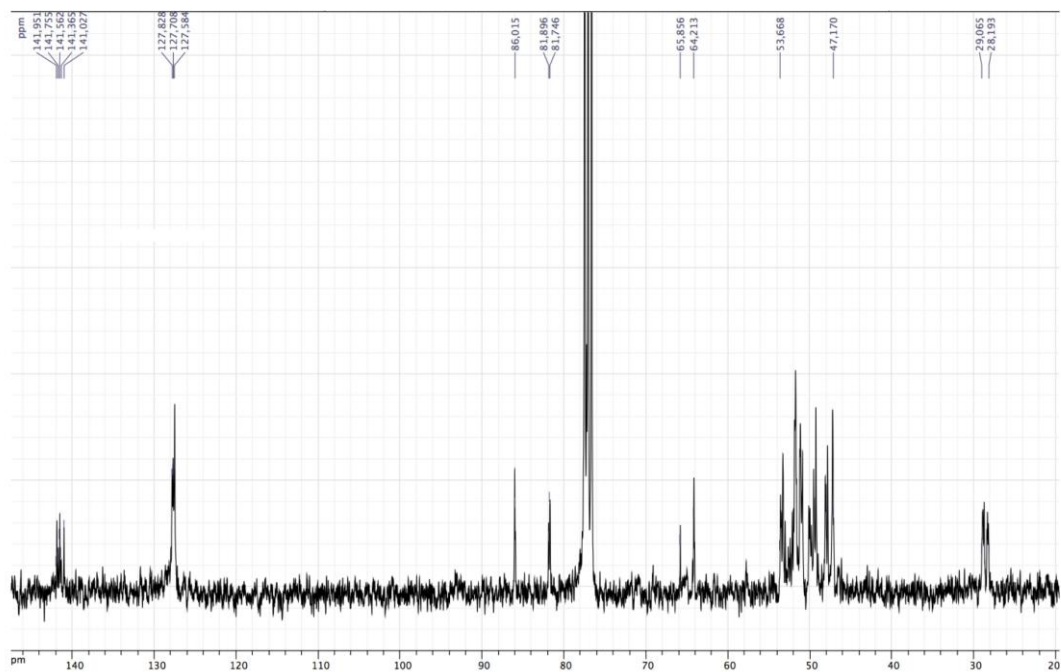

Figure 5:  $^{13}\text{C}$  NMR of the mixture of compounds 3 a-c (75 MHz,  $\text{CDCl}_3$ , 300 K)

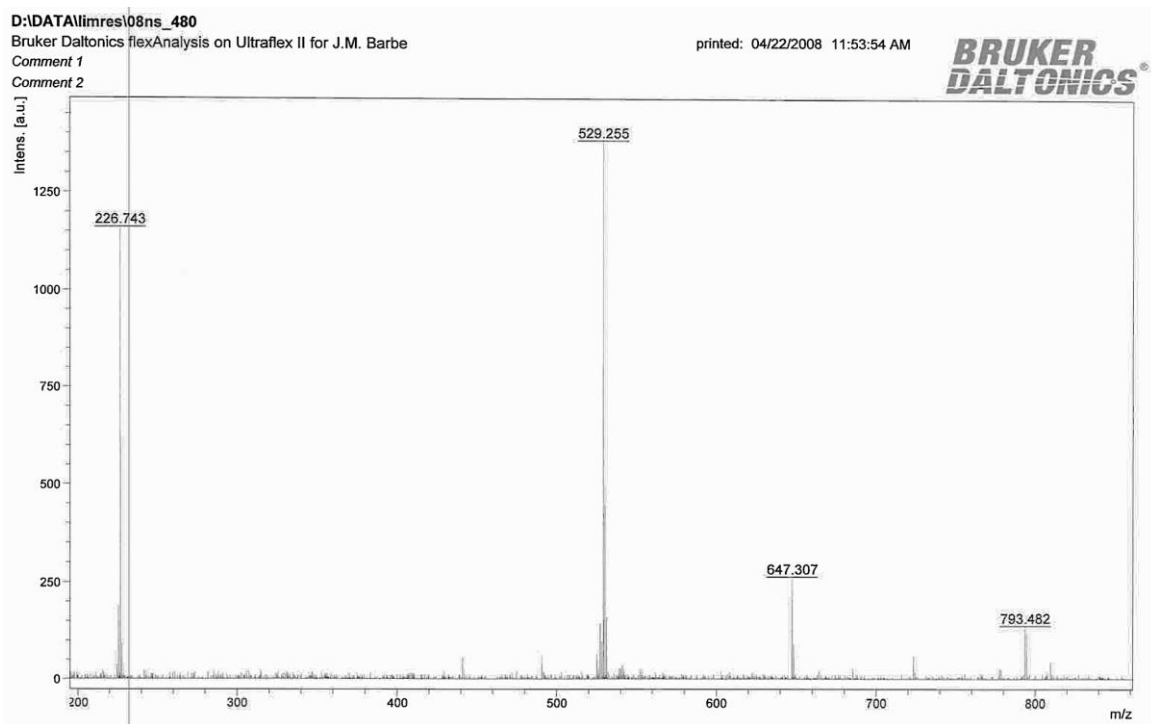

Figure 6: Mass spectrum of the mixture of compounds 3 a-c (HRMS-MALDI-TOF)

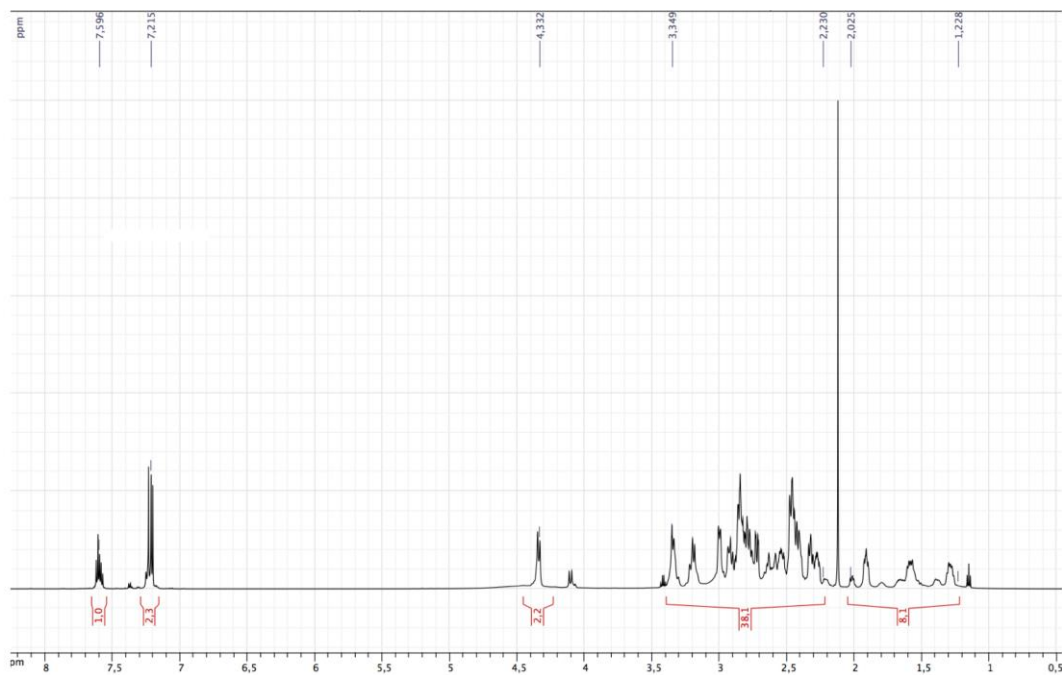

Figure 7:  $^1\text{H}$  NMR of compound 4 a - c (300 MHz,  $\text{CDCl}_3$ , 300 K)

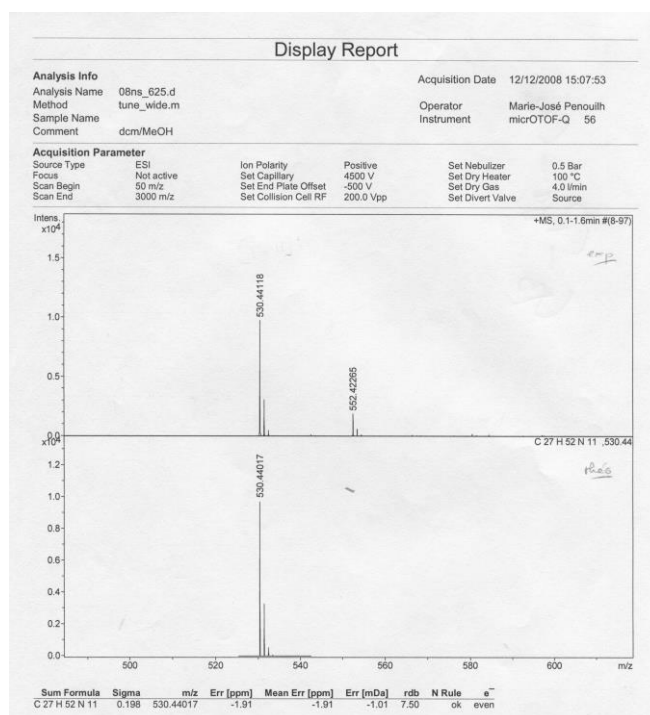

Figure 8: Mass spectrum of compound 4 a - c (ESI-TOF)

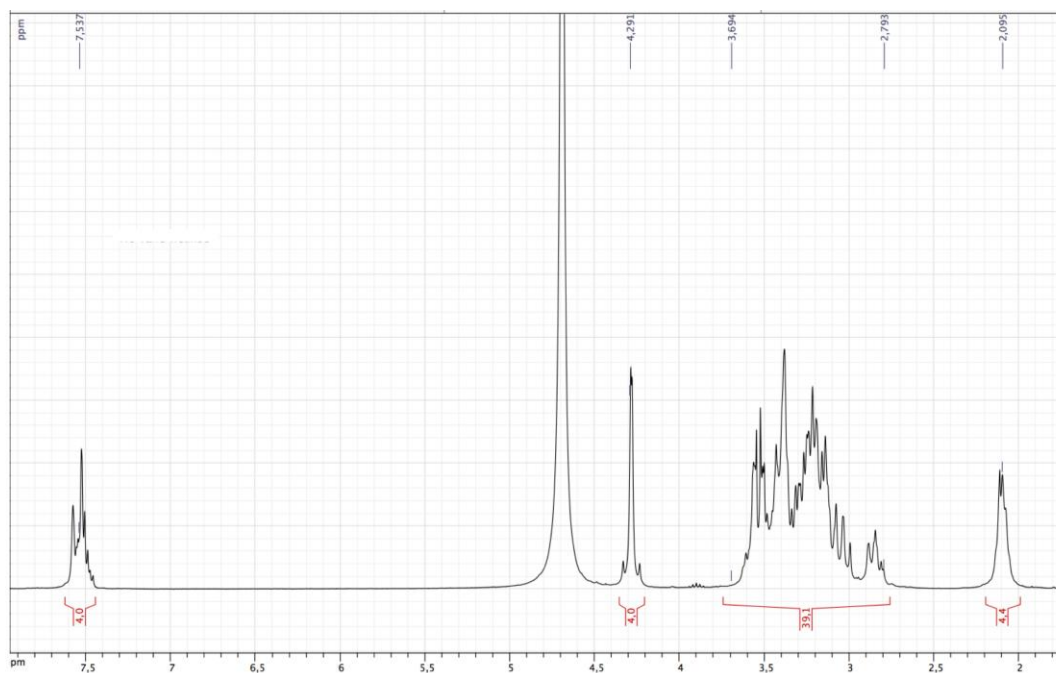

Figure 9:  $^1\text{H}$  NMR of compound 5 (300 MHz,  $\text{D}_2\text{O}$ , 300 K)

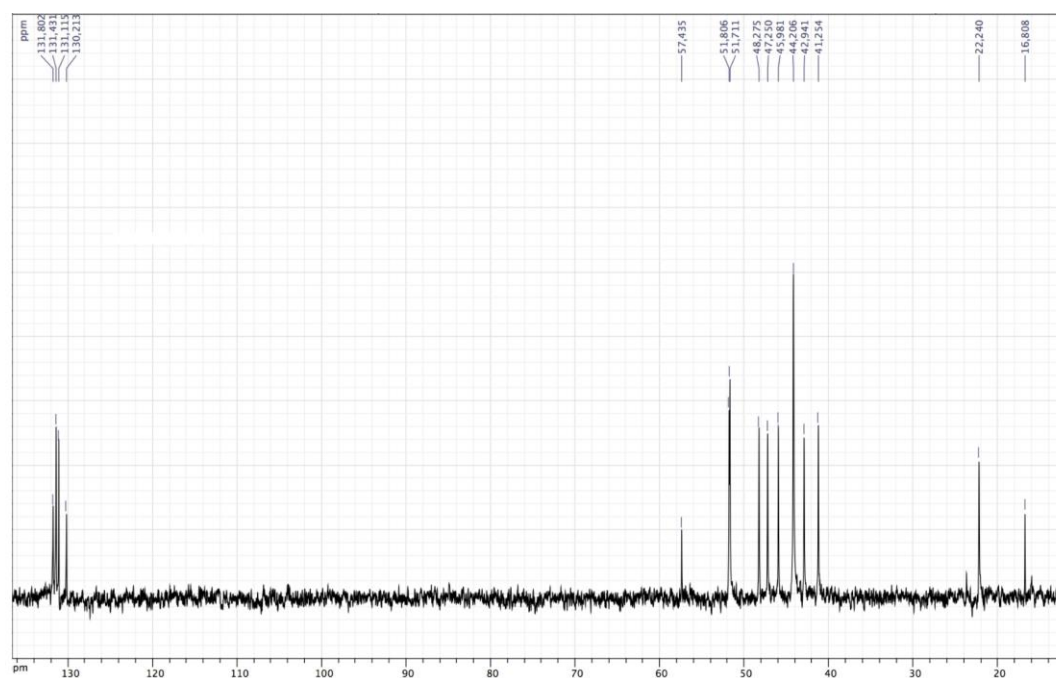

Figure 10:  $^{13}\text{C}$  NMR of compound 5 (75 MHz,  $\text{D}_2\text{O}$ , 300 K)

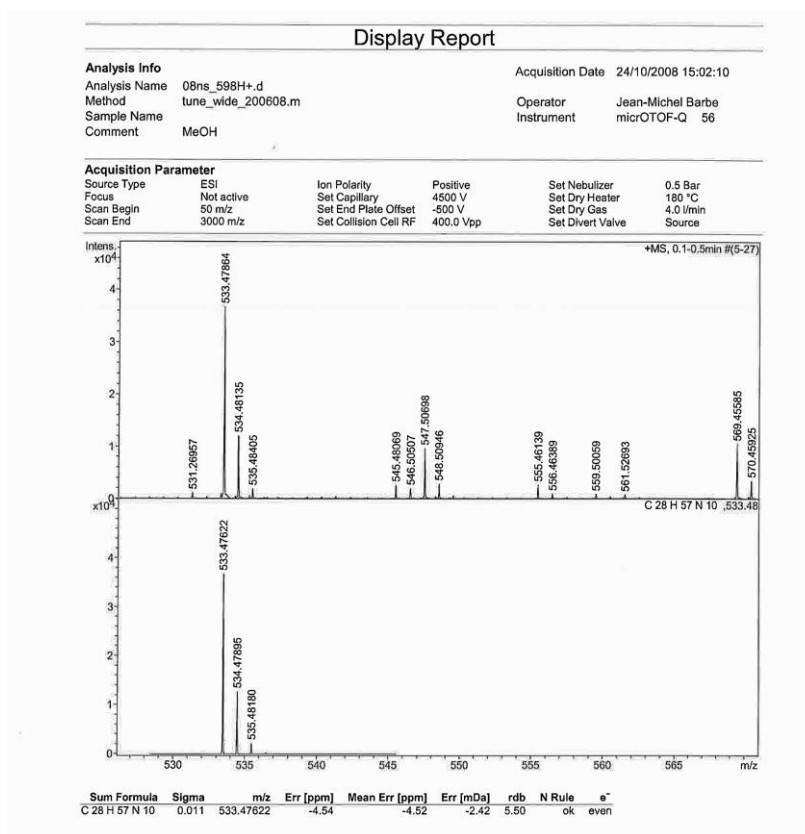

Figure 11: Mass spectrum of compound 5 (ESI-TOF)

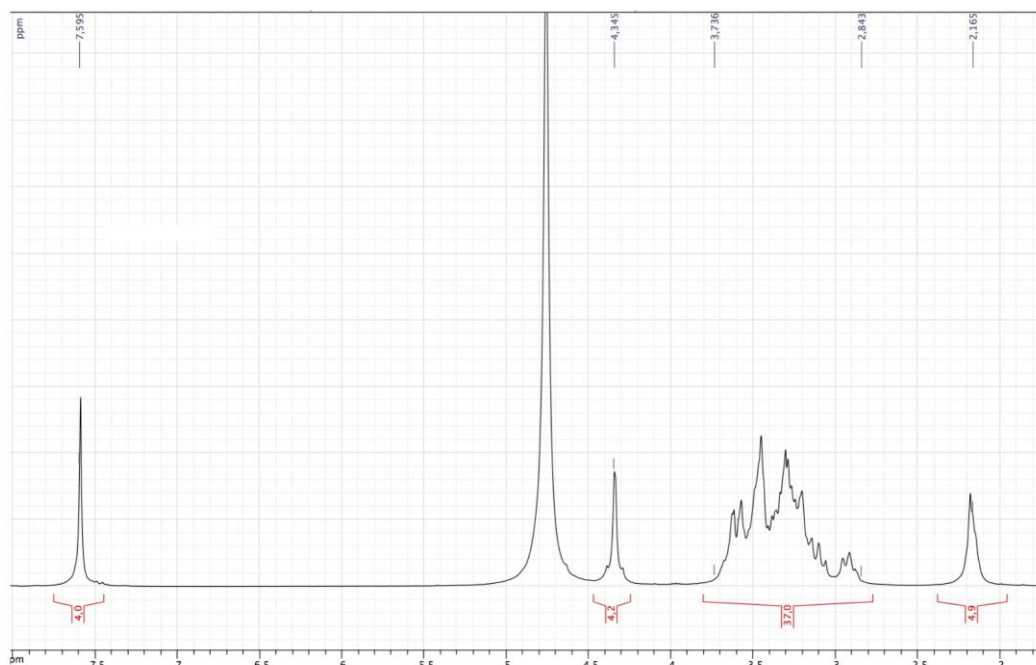

Figure 12: <sup>1</sup>H NMR of compound 6 (300 MHz, D<sub>2</sub>O, 300 K)

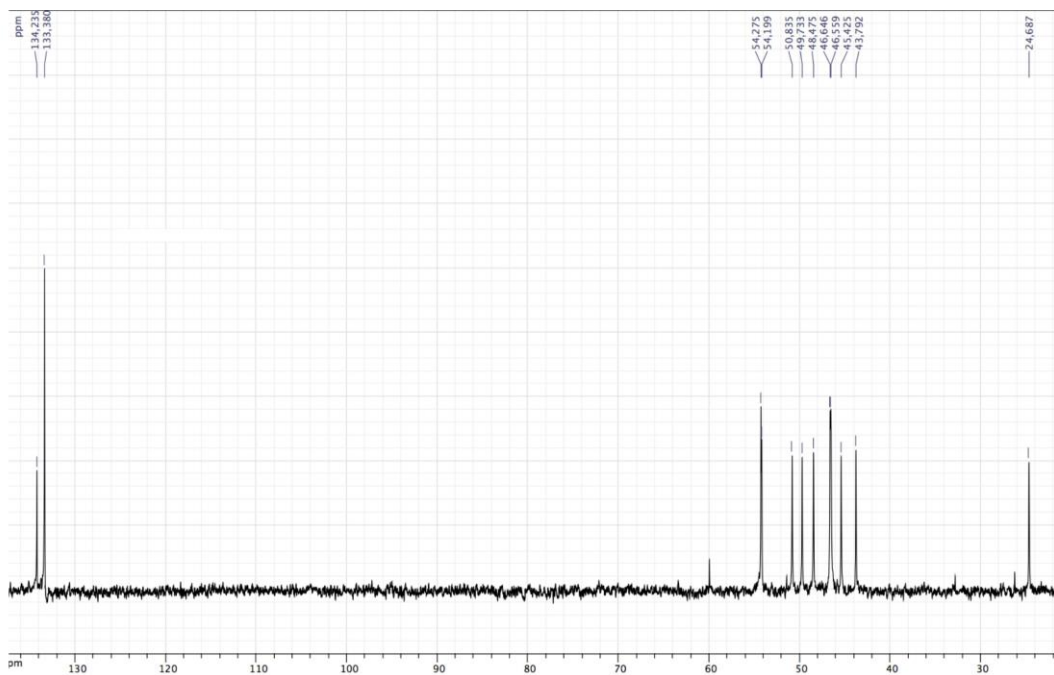

Figure 13:  $^{13}\text{C}$  NMR of compound 6 (75 MHz,  $\text{D}_2\text{O}$ , 300 K)

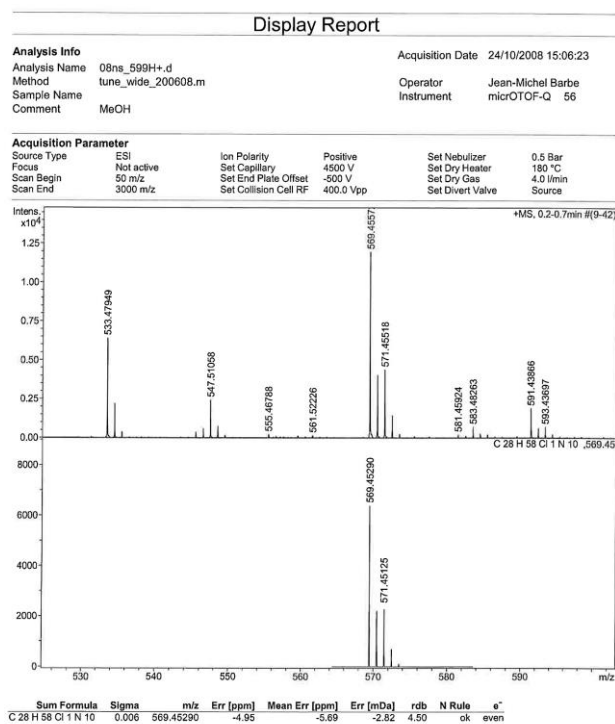

Figure 14: Mass spectrum of compound 6 (ESI-TOF)



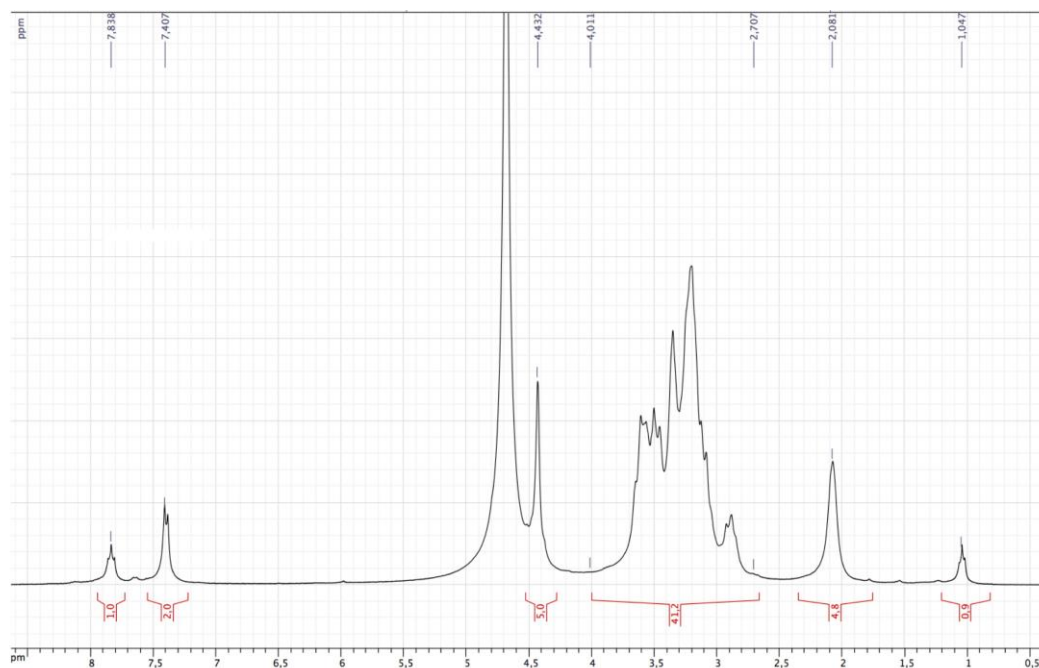

Figure 15:  $^1\text{H}$  NMR of compound 7 (600 MHz,  $\text{D}_2\text{O}$ , 300 K)

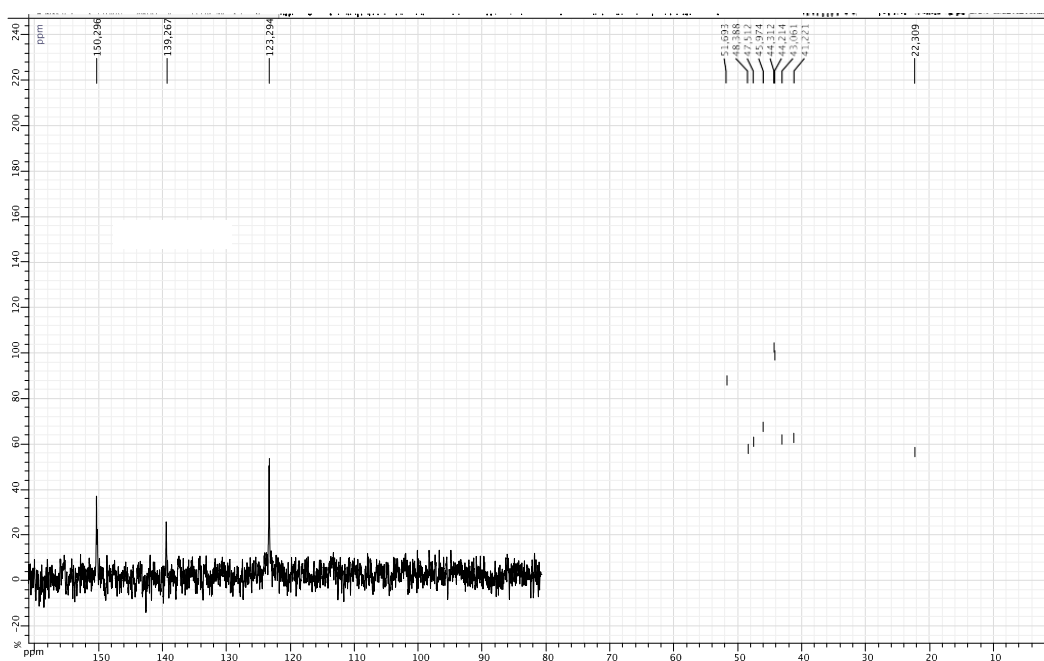

Figure 16:  $^{13}\text{C}$  NMR of compound 7 (150 MHz,  $\text{D}_2\text{O}$ , 300 K)

Analysis Name 08ns\_625H+.d  
Method tune\_wide.m  
Sample Name  
Comment MeOH

Operator Marie-José Penouilh  
Instrument micrOTOF-Q 56

Acquisition Parameter

|             |            |                       |           |                  |           |
|-------------|------------|-----------------------|-----------|------------------|-----------|
| Source Type | ESI        | Ion Polarity          | Positive  | Set Nebulizer    | 0.5 Bar   |
| Focus       | Not active | Set Capillary         | 4500 V    | Set Dry Heater   | 100 °C    |
| Scan Begin  | 50 m/z     | Set End Plate Offset  | -500 V    | Set Dry Gas      | 4.0 l/min |
| Scan End    | 3000 m/z   | Set Collision Cell RF | 200.0 Vpp | Set Divert Valve | Source    |

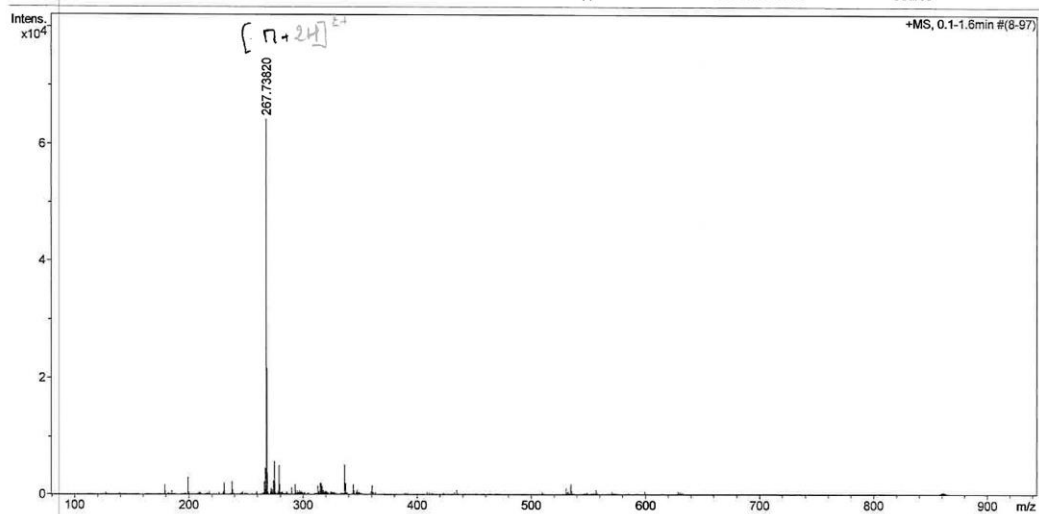

Bruker Daltonics DataAnalysis 3.4

printed: 12/12/2008 15:24:30

Page 1 of 1

Figure 17: Mass spectrum of compound 7 (ESI-TOF)

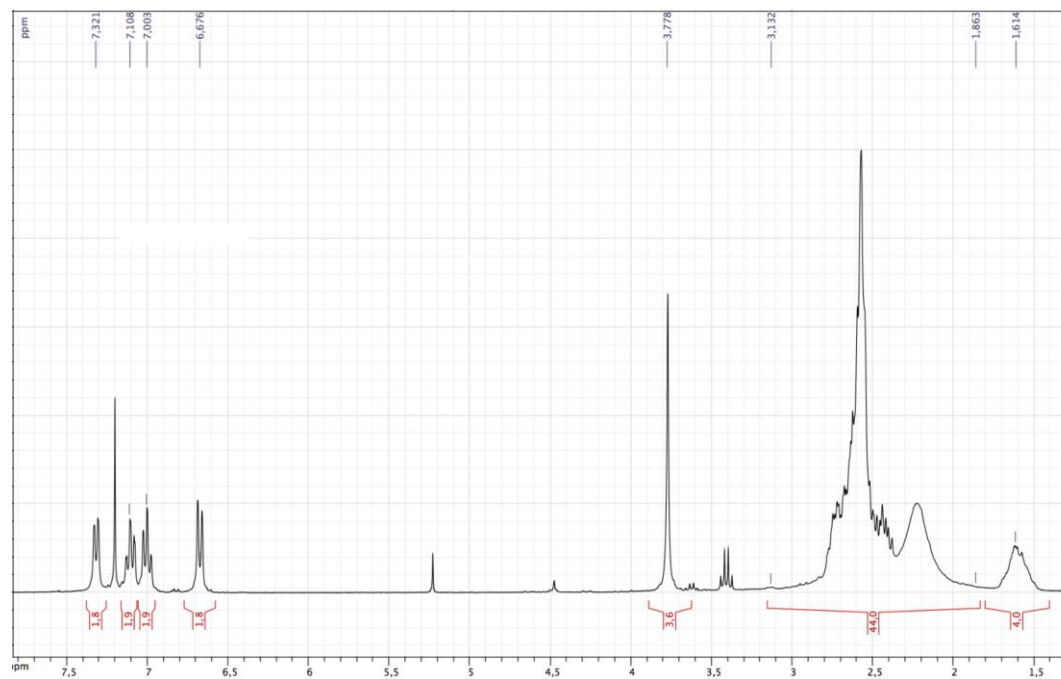

Figure 18:  $^1\text{H}$  NMR of compound 8 (300 MHz,  $\text{CDCl}_3$ , 300 K)

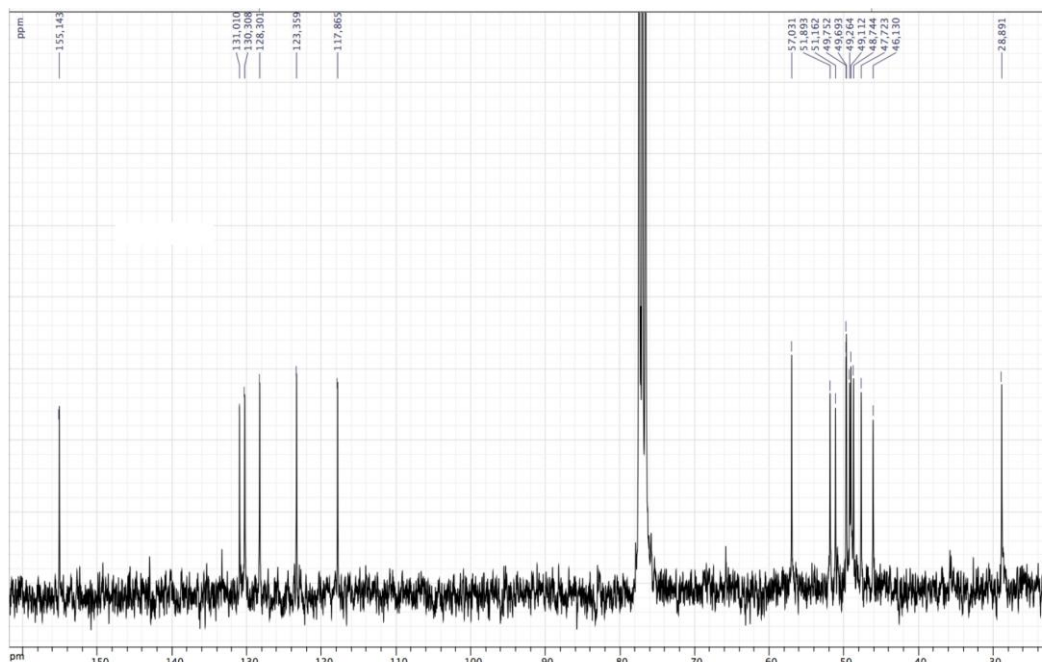

Figure 19:  $^{13}\text{C}$  NMR of compound 8 (150 MHz,  $\text{CDCl}_3$ , 300 K)

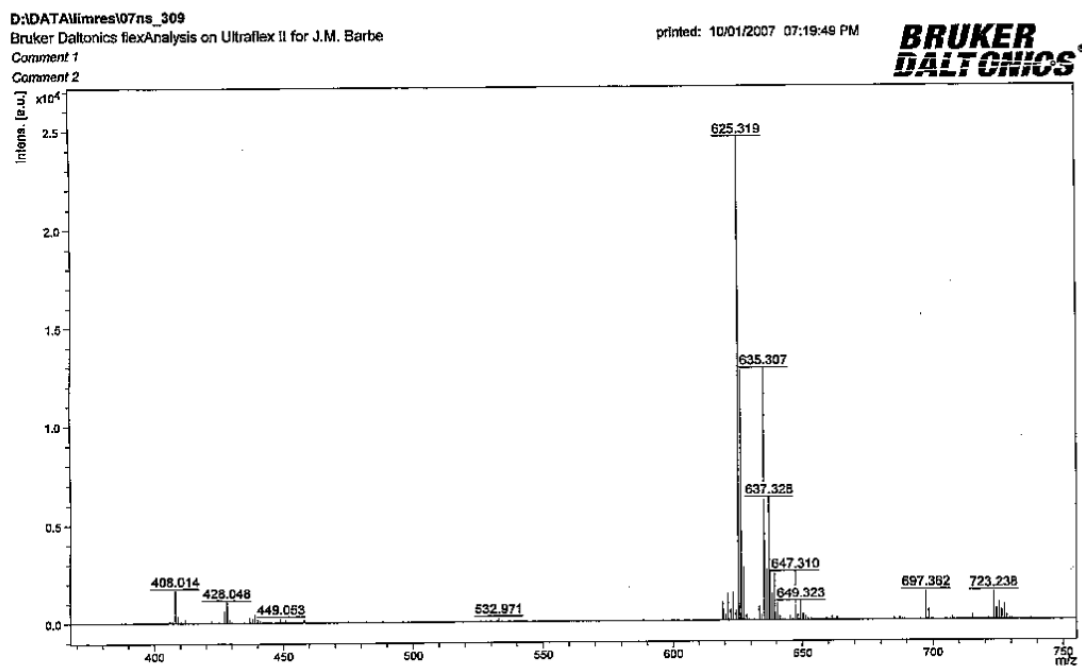

Figure 20: Mass spectrum of compound 8 (HRMS-MALDI-TOF)

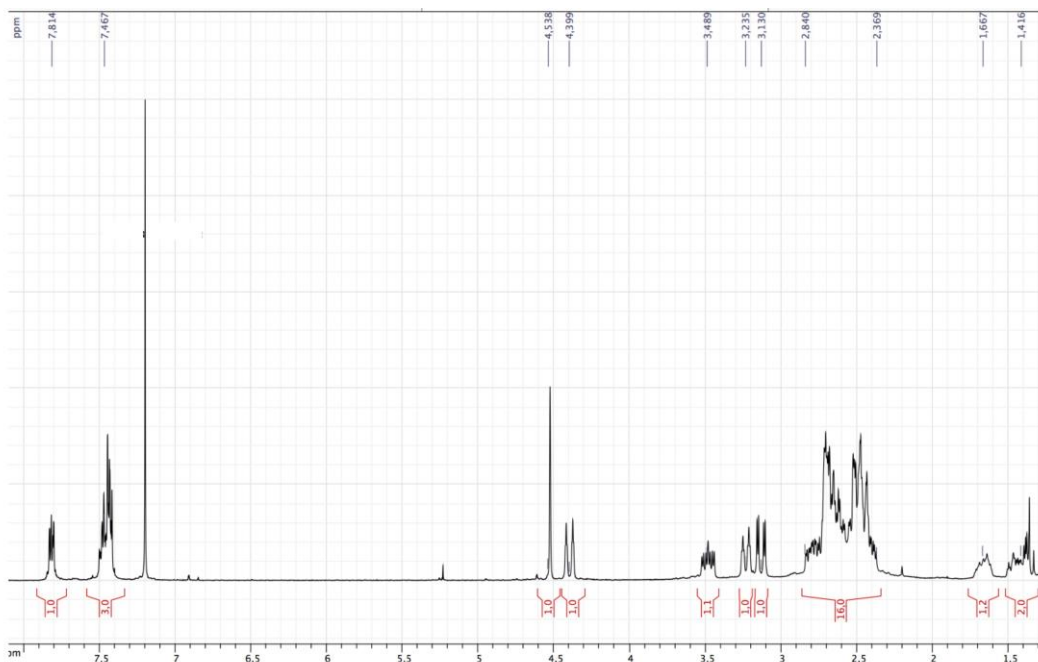

Figure 21:  $^1\text{H}$  NMR of compound 9 (150 MHz,  $\text{CDCl}_3$ , 300 K)

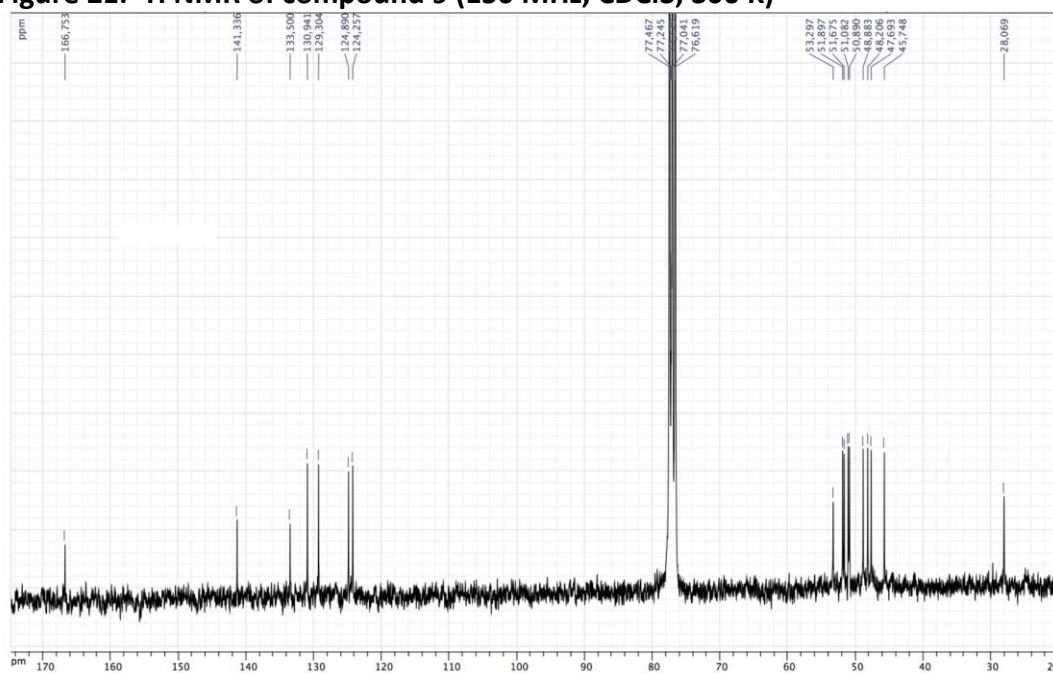

Figure 22:  $^{13}\text{C}$  NMR of compound 9 (150 MHz,  $\text{CDCl}_3$ , 300 K)

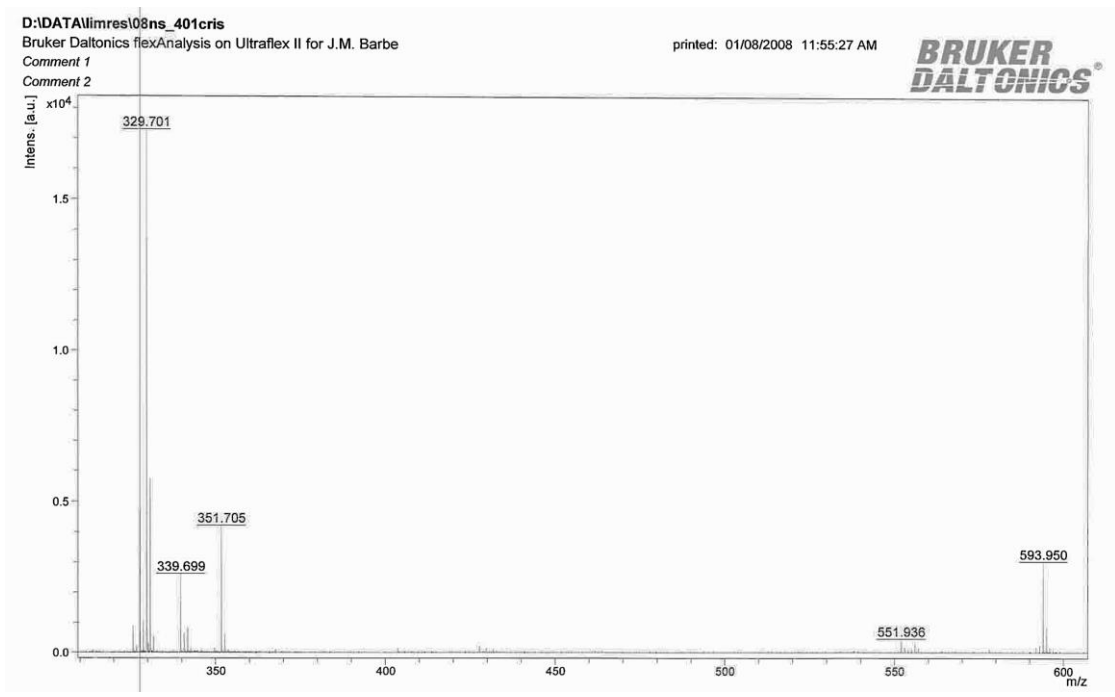

Figure 23: Mass spectrum of compound 9 (HRMS-MALDI-TOF)

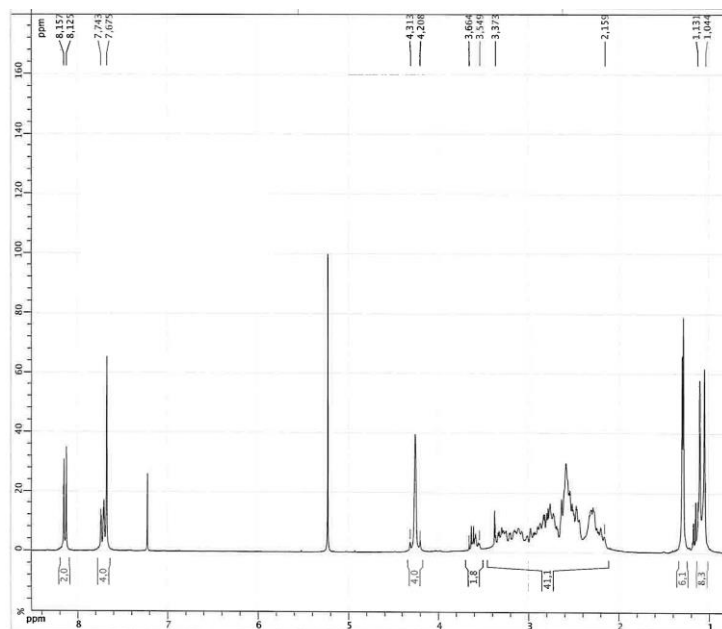

Figure 24: <sup>1</sup>H NMR of compound 11 (300 MHz, CDCl<sub>3</sub>, 300 K)

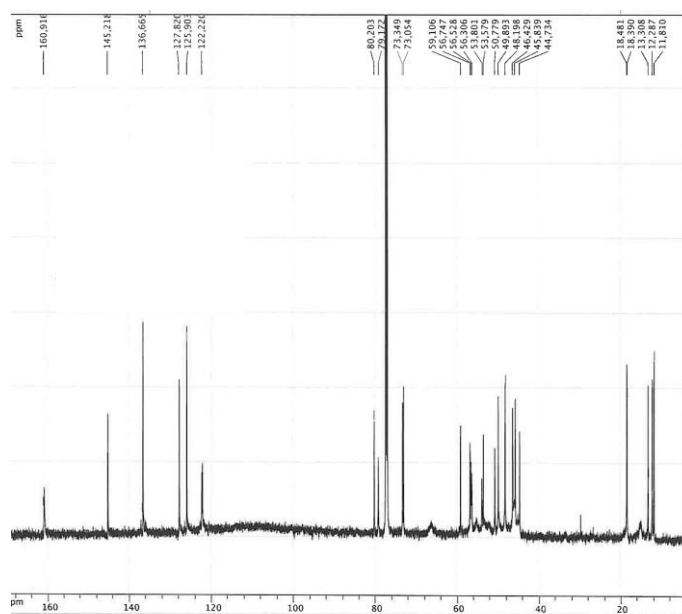

Figure 25:  $^{13}\text{C}$  NMR of compound 11 (75 MHz,  $\text{CDCl}_3$ , 300 K)

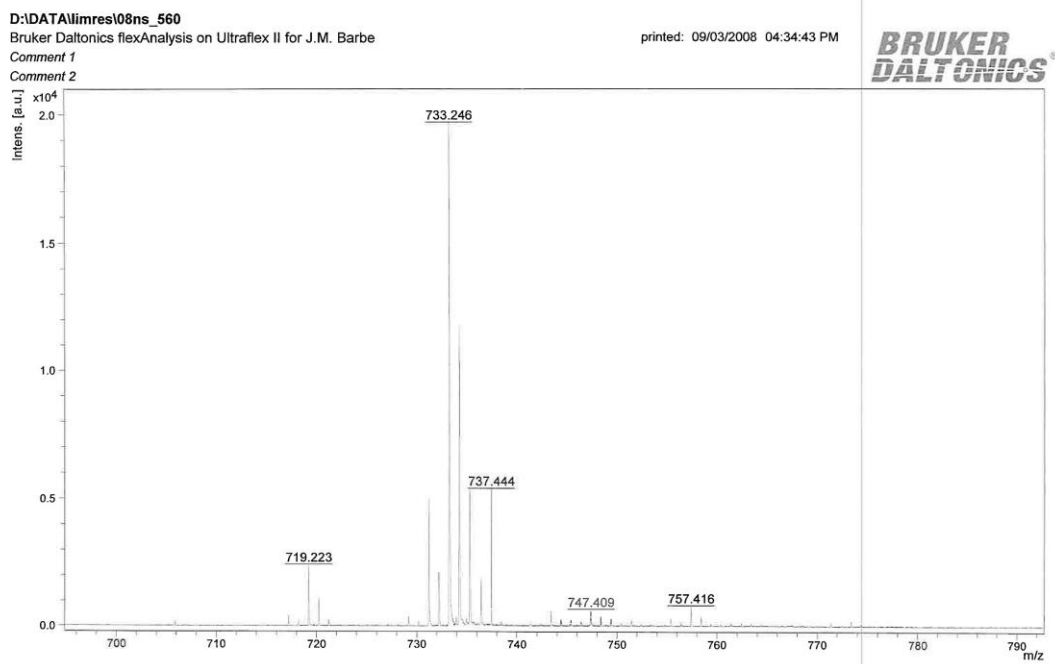

Figure 26: Mass spectrum of compound 11 (MALDI-TOF)

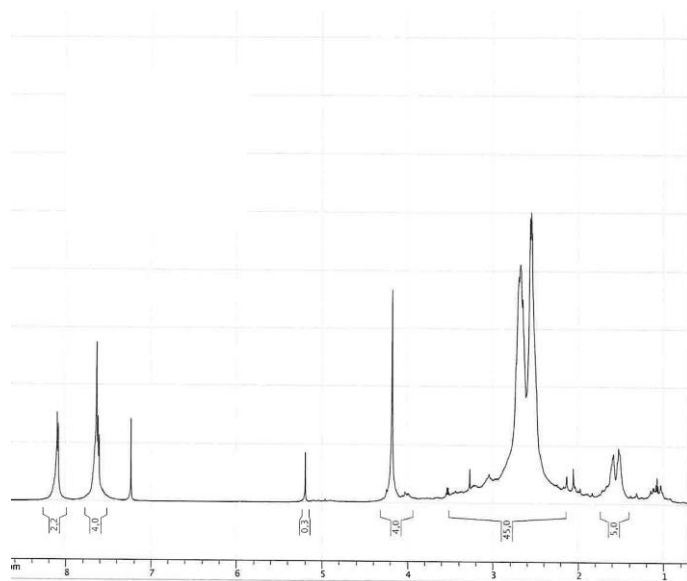

Figure 27:  $^1\text{H}$  NMR of compound 12 (300 MHz,  $\text{CDCl}_3$ , 300 K)

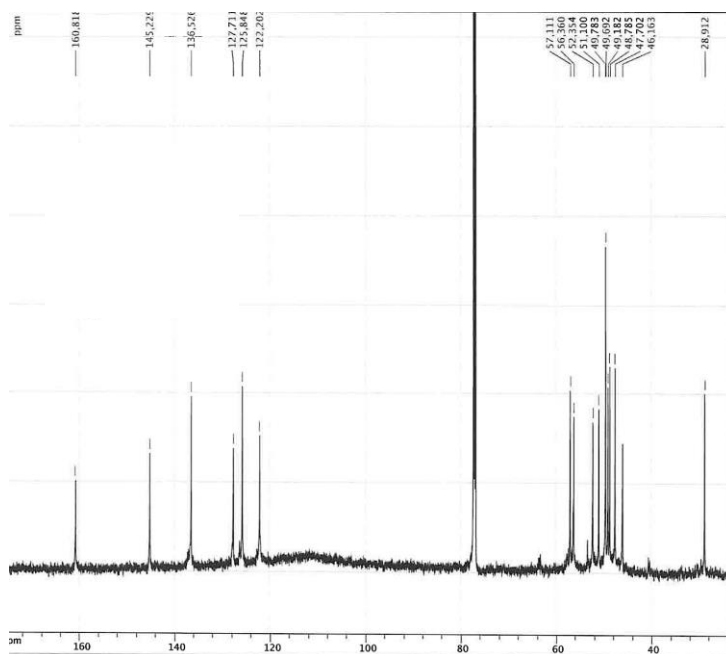

Figure 28:  $^{13}\text{C}$  NMR of compound 12 (75 MHz,  $\text{CDCl}_3$ , 300 K)

**Analysis Info**  
 Analysis Name 08ns\_600DH.d Acquisition Date 24/10/2008 15:13:16  
 Method tune\_wide\_200608.m Operator Jean-Michel Barbe  
 Sample Name Instrument micrOTOF-Q 56  
 Comment MeOH

**Acquisition Parameter**  
 Source Type ESI Ion Polarity Positive Set Nebulizer 0.5 Bar  
 Focus Not active Set Capillary 4500 V Set Dry Heater 180 °C  
 Scan Begin 50 m/z Set End Plate Offset -500 V Set Dry Gas 4.0 l/min  
 Scan End 3000 m/z Set Collision Cell RF 400.0 Vpp Set Divert Valve Source

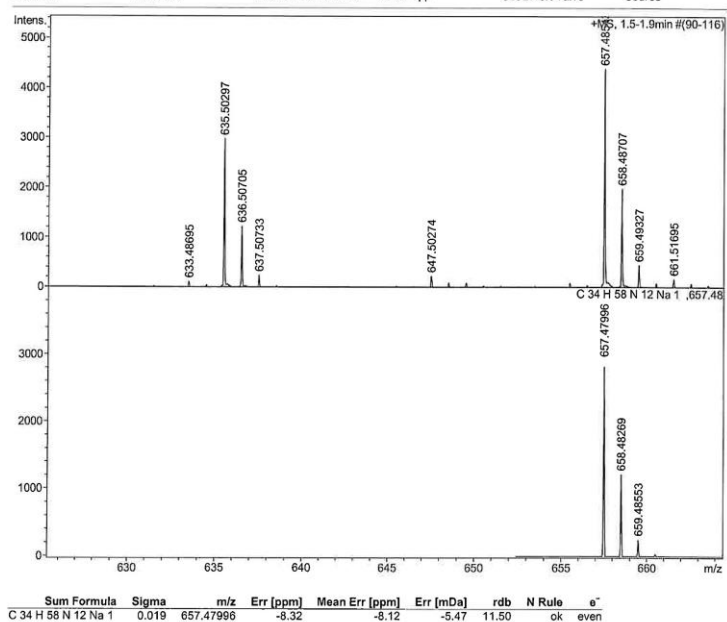

Figure 29: Mass spectrum of compound 12 (ESI-TOF)
